# Supplementary material for: Analysis of disseminated tumor cells before and after platinum based chemotherapy in primary ovarian cancer. Do stem cell like cells predict prognosis?
Source: PubMed Central journal article supplement (PMC5041992; doi:10.18632/oncotarget.8524), 2016-04-01
Supplement: oncotarget-07-26454-s001.pdf [file oncotarget-07-26454-s001.pdf]

## Analysis of disseminated tumor cells before and after platinum based chemotherapy in primary ovarian cancer. Do stem cell like cells predict prognosis?

### Supplementary Materials

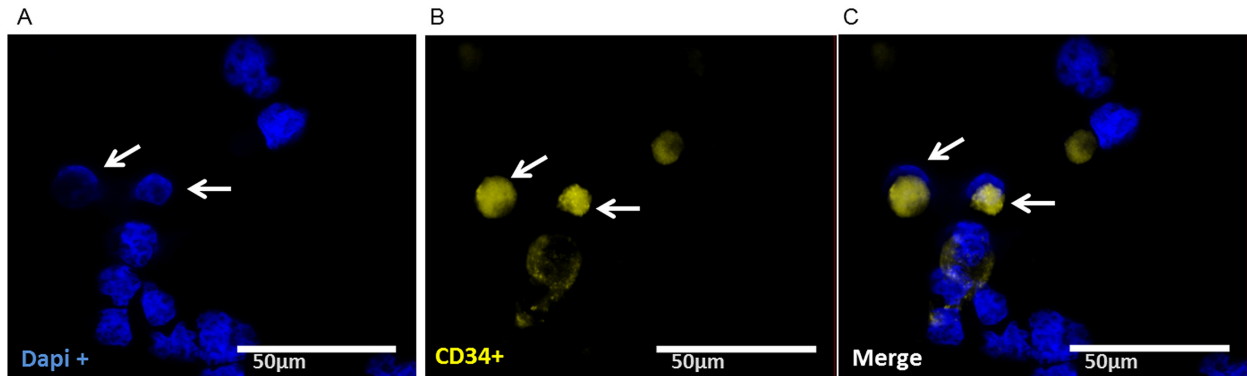

**Supplementary Figure S1: Representative staining of immunofluorescence staining of the kasumi-1 cell line used as positive control for the detection of hematopoietic stem cells (CD34<sub>pos</sub>).** (A) Cell nuclei were stained with Dapi. (B) The arrows show two CD34<sub>pos</sub> cells. (C) Indicates a merge of Dapi<sub>pos</sub> and CD34<sub>pos</sub> cells, magnification at 63 $\times$ .

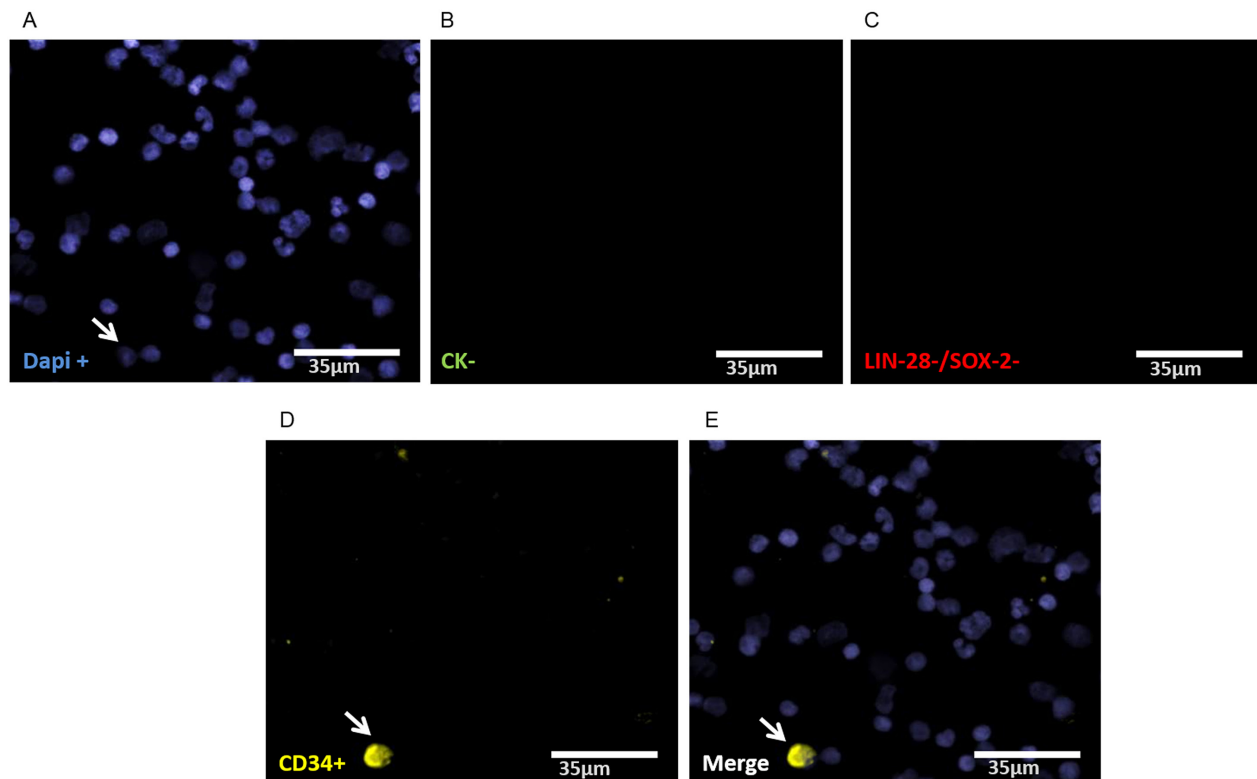

**Supplementary Figure S2: Representative four-fold immunofluorescence staining for detection of hematopoietic stem cells (CD34<sub>pos</sub>) in the bone marrow of a healthy donor using primary and secondary antibody for LIN-28 and SOX-2.** (A) Cell nuclei were stained with Dapi. (B) Indicates CK<sub>neg</sub> cells. (C) Alludes a cell with LIN-28<sub>neg</sub>/SOX-2<sub>neg</sub> phenotype. (D) Shows CD34<sub>pos</sub> cell. (E) Indicates a merge of a hematopoietic stem cell with Dapi<sub>pos</sub>, CK<sub>neg</sub>, SOX-2<sub>neg</sub>/LIN-28<sub>neg</sub>, CD34<sub>pos</sub> phenotype, magnification at 40 $\times$ .

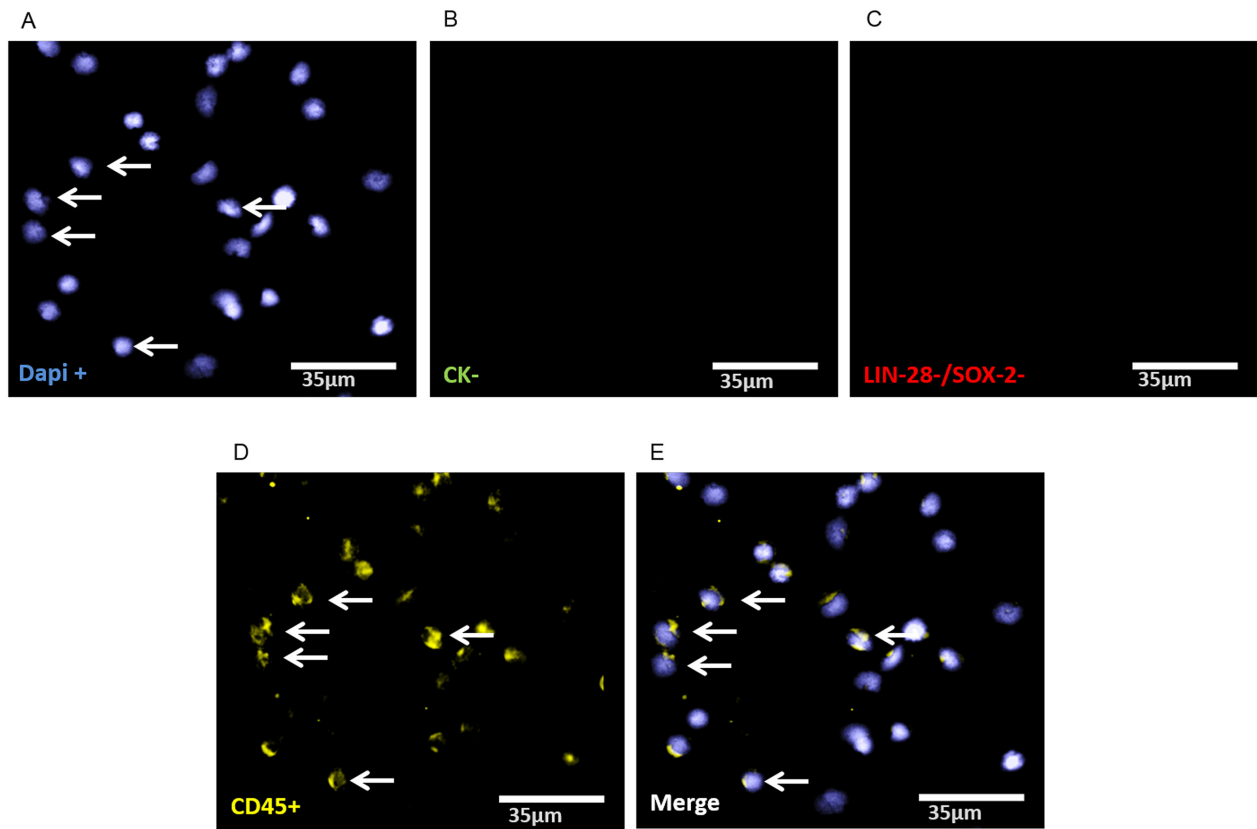

**Supplementary Figure S3: Representative four-fold immunofluorescence staining for detection of leukocytes ( $CD45_{pos}$ ) in the bone marrow of a healthy donor using primary and secondary antibody for LIN-28 and SOX-2. (A) Cell nuclei were stained with Dapi. (B) Indicates  $CK_{neg}$  cells. (C) Alludes a cell with  $LIN-28_{neg}/SOX-2_{neg}$  phenotype. (D) Shows a  $CD34_{pos}$  cell. (E) Indicates a merge of hematopoietic stem cells with  $Dapi_{pos}$ ,  $CK_{neg}$ ,  $SOX-2_{neg}/LIN-28_{neg}$ ,  $CD45_{pos}$  phenotype, magnification at 40 $\times$ .**

**Supplementary Table S1: Characteristics of patients analyzed for DTCs with stem cell character**

| Total              | 10                                |
|--------------------|-----------------------------------|
| Age                | median 58 years, (30–77)          |
| FIGO stage         |                                   |
| I–II               | 1 (10%)                           |
| III                | 6 (60%)                           |
| IV                 | 3 (30%)                           |
| Nodal status       |                                   |
| N <sub>0</sub>     | 3 (30%)                           |
| N <sub>1</sub>     | 2 (20%)                           |
| N <sub>x</sub>     | 5 (50%)                           |
| Grading            |                                   |
| I–II               | 7 (70%)                           |
| III                | 3 (30%)                           |
| Residual tumor     |                                   |
| Macroscopic        |                                   |
| Complete resection | 4 (40%)                           |
| Any residual tumor | 6 (60%)                           |
| Histologic type    |                                   |
| Serous             | 8 (80%)                           |
| Other              | 2 (20%)                           |
| Survival           |                                   |
| PFS <sup>1</sup>   | median 18 months, (4–72 months)   |
| OS <sup>2</sup>    | median 53 months, (13–101 months) |
| Alive              | 4 (40%)                           |
| Dead               | 6 (60%)                           |
| Recurrence         |                                   |
| No relapse         | 2 (20%)                           |
| Relapse            | 8 (80%)                           |

<sup>1</sup>PFS: progression-free survival, <sup>2</sup>OS: overall survival.
